# Supplementary material
Source: Research Square preprint supplement (doi:10.21203/rs.3.rs-9748634/v1)
Supplement: Supplementary file 1 [file 709b5fb8ded86aada3fafd27.docx]

| **Supplementary Table S1. Summary of sequence read counts, total base-pair counts, and read-length statistics for each sample.** | | | | | | | | | |
| --- | --- | --- | --- | --- | --- | --- | --- | --- | --- |
| Site ID | Site name | File name | R1 | | |  | R2 | | |
| reads_num | total_bases | len_mean |  | reads_num | reads_length | len_mean |
| 1 | Coral Farm | Shikina2-3-1_S25 | 1581477 | 473164014 | 299.1912 |  | 1360218 | 403290852 | 296.4899 |
| 1 | Coral Farm | Shikina2-3-2_S26 | 1872014 | 561272606 | 299.8229 |  | 851514 | 255621381 | 300.1963 |
| 1 | Coral Farm | Shikina2-3-3_S27 | 1570526 | 469037644 | 298.65 |  | 1530785 | 460256543 | 300.667 |
| 2 | Guihou | Shikina1-3-1_S7 | 1566691 | 469317830 | 299.5599 |  | 1681725 | 503692838 | 299.5096 |
| 2 | Guihou | Shikina1-3-2_S8 | 1661225 | 499408144 | 300.6264 |  | 946608 | 284190293 | 300.2196 |
| 2 | Guihou | Shikina1-3-3_S9 | 1582841 | 474969746 | 300.0742 |  | 1399406 | 420460482 | 300.4564 |
| 3 | Wanghaixiang | Shikina1-4-1_S10 | 1236308 | 370047699 | 299.3168 |  | 1566691 | 469945125 | 299.9603 |
| 3 | Wanghaixiang | Shikina1-4-2_S11 | 1205921 | 362745779 | 300.8039 |  | 1661225 | 499283293 | 300.5513 |
| 3 | Wanghaixiang | Shikina1-4-3_S12 | 1274638 | 382685739 | 300.2309 |  | 1582841 | 475153207 | 300.1901 |
| 4 | Taipower SH | Shikina2-1-1_S19 | 1467803 | 441491584 | 300.7839 |  | 1236308 | 370239444 | 299.4719 |
| 4 | Taipower SH | Shikina2-1-2_S20 | 1495039 | 449327657 | 300.5458 |  | 1205921 | 361204761 | 299.5261 |
| 4 | Taipower SH | Shikina2-1-3_S21 | 1918567 | 576222997 | 300.3403 |  | 1274638 | 382798566 | 300.3194 |
| 5 | CPC SH-1 | Shikina2-6-1_S34 | 1134522 | 340364024 | 300.0065 |  | 1081030 | 323815944 | 299.5439 |
| 5 | CPC SH-1 | Shikina2-6-2_S35 | 1743737 | 521801989 | 299.2435 |  | 1323171 | 397488615 | 300.4061 |
| 5 | CPC SH-1 | Shikina2-6-3_S36 | 1441271 | 432647736 | 300.1849 |  | 1004116 | 299200707 | 297.9742 |
| 6 | CPC SH-2 | Shikina2-5-1_S31 | 1081717 | 324849493 | 300.3091 |  | 1084247 | 324522357 | 299.3067 |
| 6 | CPC SH-2 | Shikina2-5-2_S32 | 1044356 | 313408215 | 300.0971 |  | 1276809 | 327787027 | 256.7236 |
| 6 | CPC SH-2 | Shikina2-5-3_S33 | 1071297 | 319221950 | 297.9771 |  | 1119633 | 331965728 | 296.4951 |
| 7 | CPC SH-3 | Shikina2-4-1_S28 | 1096167 | 327689845 | 298.9415 |  | 1467803 | 441370825 | 300.7017 |
| 7 | CPC SH-3 | Shikina2-4-2_S29 | 1253272 | 374696843 | 298.9749 |  | 1495039 | 449373432 | 300.5764 |
| 7 | CPC SH-3 | Shikina2-4-3_S30 | 1510121 | 452925822 | 299.9268 |  | 1918567 | 576379983 | 300.4221 |
| 8 | Nanya | Shikina1-2-1_S4 | 1681725 | 502076191 | 298.5483 |  | 1420197 | 422749521 | 297.6696 |
| 8 | Nanya | Shikina1-2-2_S5 | 946608 | 283648487 | 299.6473 |  | 1073318 | 321777662 | 299.7971 |
| 8 | Nanya | Shikina1-2-3_S6 | 1399406 | 420091259 | 300.1926 |  | 1380381 | 410204705 | 297.1677 |
| 9 | Bitou | Shikina1-1-1_S1 | 1360218 | 400722171 | 294.6014 |  | 1581477 | 473578155 | 299.4531 |
| 9 | Bitou | Shikina1-1-2_S2 | 851514 | 255393880 | 299.9292 |  | 1872014 | 560862079 | 299.6036 |
| 9 | Bitou | Shikina1-1-3_S3 | 1530785 | 459567129 | 300.2166 |  | 1570526 | 469718237 | 299.0834 |
| 10 | Maoao Bay | Shikina2-2-1_S22 | 1420197 | 422591009 | 297.558 |  | 1096167 | 327977957 | 299.2044 |
| 10 | Maoao Bay | Shikina2-2-2_S23 | 1073318 | 321672443 | 299.6991 |  | 1253272 | 374927931 | 299.1593 |
| 10 | Maoao Bay | Shikina2-2-3_S24 | 1380381 | 405674563 | 293.8859 |  | 1510121 | 453014782 | 299.9858 |
| 11 | Waiao Beach | Shikina3-4-1_S46 | 1028339 | 308958666 | 300.4444 |  | 1081717 | 324515527 | 300.0004 |
| 11 | Waiao Beach | Shikina3-4-2_S47 | 1088430 | 314145281 | 288.6224 |  | 1044356 | 313406286 | 300.0953 |
| 11 | Waiao Beach | Shikina3-4-3_S48 | 1193739 | 357495695 | 299.4756 |  | 1071297 | 320259903 | 298.946 |
| 12 | Tofu Cape | Shikina3-5-1_S49 | 1082892 | 323801082 | 299.0151 |  | 1134522 | 340343982 | 299.9889 |
| 12 | Tofu Cape | Shikina3-5-2_S50 | 1206181 | 360820232 | 299.1427 |  | 1743737 | 523236735 | 300.0663 |
| 12 | Tofu Cape | Shikina3-5-3_S51 | 1217893 | 363830569 | 298.7377 |  | 1441271 | 433356672 | 300.6767 |
| 13 | Nanao | Shikina3-6-1_S52 | 970370 | 289838150 | 298.6883 |  | 1550693 | 466239570 | 300.6653 |
| 13 | Nanao | Shikina3-6-2_S53 | 1152868 | 345704467 | 299.8647 |  | 1874338 | 563992145 | 300.902 |
| 13 | Nanao | Shikina3-6-3_S54 | 3536108 | 401238909 | 113.4691 |  | 1393412 | 418820526 | 300.5719 |
| 14 | Shitiping | Shikina3-1-1_S37 | 1550693 | 465512703 | 300.1966 |  | 1500272 | 451236635 | 300.7699 |
| 14 | Shitiping | Shikina3-1-2_S38 | 1874338 | 563447144 | 300.6113 |  | 1195599 | 358453450 | 299.8108 |
| 14 | Shitiping | Shikina3-1-3_S39 | 1393412 | 418443499 | 300.3013 |  | 1618555 | 486977611 | 300.8718 |
| 15 | Jihui | Shikina3-2-1_S40 | 1500272 | 450723541 | 300.4279 |  | 1214247 | 364515163 | 300.1985 |
| 15 | Jihui | Shikina3-2-2_S41 | 1195599 | 358062762 | 299.484 |  | 996216 | 298411695 | 299.5452 |
| 15 | Jihui | Shikina3-2-3_S42 | 1618555 | 486408872 | 300.5204 |  | 1122270 | 335857123 | 299.2659 |
| 16 | Shanyuan | Shikina3-3-1_S43 | 1214247 | 363837352 | 299.6403 |  | 1028339 | 307615672 | 299.1384 |
| 16 | Shanyuan | Shikina3-3-2_S44 | 996216 | 299382949 | 300.5201 |  | 1088430 | 315325794 | 289.707 |
| 16 | Shanyuan | Shikina3-3-3_S45 | 1122270 | 337639964 | 300.8545 |  | 1193739 | 358457403 | 300.2812 |
| 17 | Xuhai | Shikina4-2-1_S58 | 1633903 | 490916081 | 300.4561 |  | 1082892 | 324651930 | 299.8008 |
| 17 | Xuhai | Shikina4-2-2_S59 | 1132953 | 338468622 | 298.749 |  | 1206181 | 361378040 | 299.6052 |
| 17 | Xuhai | Shikina4-2-3_S60 | 1687239 | 429954610 | 254.8273 |  | 1217893 | 365199560 | 299.8618 |
| 18 | South Bay | Shikina4-3-1_S61 | 1310326 | 393055402 | 299.9676 |  | 970370 | 290516172 | 299.387 |
| 18 | South Bay | Shikina4-3-2_S62 | 1185854 | 356445919 | 300.5816 |  | 1152868 | 345813003 | 299.9589 |
| 18 | South Bay | Shikina4-3-3_S63 | 1011670 | 302912874 | 299.4187 |  | 3536108 | 639370356 | 180.8119 |
| 19 | Houbihu | Shikina4-4-1_S64 | 1488165 | 446155816 | 299.8027 |  | 1124538 | 337635353 | 300.2436 |
| 19 | Houbihu | Shikina4-4-2_S65 | 1144446 | 341654797 | 298.5329 |  | 1037245 | 311308050 | 300.1297 |
| 19 | Houbihu | Shikina4-4-3_S66 | 1457820 | 437852631 | 300.3475 |  | 1106470 | 328984487 | 297.328 |
| 20 | Water Outlet | Shikina4-5-1_S67 | 986261 | 296279768 | 300.4071 |  | 1633903 | 491634399 | 300.8957 |
| 20 | Water Outlet | Shikina4-5-2_S68 | 1266792 | 380470988 | 300.3421 |  | 1132953 | 338356376 | 298.65 |
| 20 | Water Outlet | Shikina4-5-3_S69 | 1502669 | 451109009 | 300.2052 |  | 1687239 | 446497811 | 264.6322 |
| 21 | Wanlitong | Shikina4-6-1_S70 | 1615572 | 485616122 | 300.5846 |  | 1310326 | 393513025 | 300.3169 |
| 21 | Wanlitong | Shikina4-6-2_S71 | 1109847 | 333461750 | 300.4574 |  | 1185854 | 356694015 | 300.7908 |
| 21 | Wanlitong | Shikina4-6-3_S72 | 1575580 | 473823512 | 300.7296 |  | 1011670 | 303352649 | 299.8534 |
| 22 | Xiziwan | Shikina4-1-1_S55 | 1124538 | 337497648 | 300.1212 |  | 1488165 | 446623861 | 300.1172 |
| 22 | Xiziwan | Shikina4-1-2_S56 | 1037245 | 311060252 | 299.8908 |  | 1144446 | 343075542 | 299.7743 |
| 22 | Xiziwan | Shikina4-1-3_S57 | 1106470 | 328026582 | 296.4622 |  | 1457820 | 438253832 | 300.6227 |
| 23 | Xiaoliuqiu Island - Beauty Beach | Shikina4-7-1_S73 | 1161395 | 345358214 | 297.365 |  | 986261 | 296439228 | 300.5687 |
| 23 | Xiaoliuqiu Island - Beauty Beach | Shikina4-7-2_S74 | 1268756 | 381040788 | 300.3263 |  | 1266792 | 380957614 | 300.7263 |
| 23 | Xiaoliuqiu Island - Beauty Beach | Shikina4-7-3_S75 | 1203685 | 360820900 | 299.7636 |  | 1502669 | 451333488 | 300.3546 |
| 24 | Xiaoliuqiu Island - Yuchengwei | Shikina4-8-1_S76 | 1568403 | 471286702 | 300.4883 |  | 1615572 | 486175558 | 300.9309 |
| 24 | Xiaoliuqiu Island - Yuchengwei | Shikina4-8-2_S77 | 1113969 | 334454545 | 300.2369 |  | 1109847 | 333771108 | 300.7361 |
| 24 | Xiaoliuqiu Island - Yuchengwei | Shikina4-8-3_S78 | 1460936 | 438418185 | 300.094 |  | 1575580 | 474150568 | 300.9372 |
| 25 | Xiaoliuqiu Island- Houshi | Shikina4-9-1_S79 | 1366621 | 409860932 | 299.9083 |  | 1161395 | 348276364 | 299.8776 |
| 25 | Xiaoliuqiu Island- Houshi | Shikina4-9-2_S80 | 1620075 | 486520540 | 300.3074 |  | 1268756 | 381526365 | 300.709 |
| 25 | Xiaoliuqiu Island- Houshi | Shikina4-9-3_S81 | 1334250 | 400715735 | 300.3303 |  | 1203685 | 361029214 | 299.9366 |
| 26 | Taoyuan Algal Reef G1 | Shikina1-5-1_S13 | 1081030 | 324450561 | 300.131 |  | 1568403 | 471910024 | 300.8857 |
| 26 | Taoyuan Algal Reef G1 | Shikina1-5-2_S14 | 1323171 | 397836609 | 300.6691 |  | 1113969 | 334887705 | 300.6257 |
| 26 | Taoyuan Algal Reef G1 | Shikina1-5-3_S15 | 1004116 | 298179978 | 296.9577 |  | 1460936 | 438997548 | 300.4906 |
| 27 | Taoyuan Algal Reef G2-1 | Shikina1-6-1_S16 | 1084247 | 324431048 | 299.2225 |  | 1366621 | 410035192 | 300.0358 |
| 27 | Taoyuan Algal Reef G2-1 | Shikina1-6-2_S17 | 1276809 | 319797230 | 250.466 |  | 1620075 | 486795764 | 300.4773 |
| 27 | Taoyuan Algal Reef G2-1 | Shikina1-6-3_S18 | 1119633 | 329387414 | 294.1923 |  | 1334250 | 400777759 | 300.3768 |
| 28 | Taoyuan Algal Reef G2-2 | Shikina5-1-1_S100 | 3572936 | 1074817170 | 300.8218 |  | 3572936 | 1075254914 | 300.9444 |
| 28 | Taoyuan Algal Reef G2-2 | Shikina5-1-2_S101 | 3496039 | 1051724268 | 300.8331 |  | 3496039 | 1052117861 | 300.9457 |
| 28 | Taoyuan Algal Reef G2-2 | Shikina5-1-3_S102 | 3443253 | 1035853672 | 300.8358 |  | 3443253 | 1036313522 | 300.9693 |
| 28 | Taoyuan Algal Reef G2-2 | Shikina5-1-4_S103 | 2986601 | 898197517 | 300.7424 |  | 2986601 | 897726261 | 300.5846 |
| 29 | Penghu islands - Qitou | Shikina5-5-1_S113 | 2176726 | 655014663 | 300.9174 |  | 2176726 | 654577694 | 300.7166 |
| 29 | Penghu islands - Qitou | Shikina5-5-2_S114 | 2190445 | 659129969 | 300.9114 |  | 2190445 | 658551973 | 300.6476 |
| 29 | Penghu islands - Qitou | Shikina5-5-3_S115 | 2011455 | 605259408 | 300.9063 |  | 2011455 | 604926832 | 300.7409 |
| 30 | Penghu islands - Chixi | Shikina5-3-1_S107 | 2634818 | 792740986 | 300.8713 |  | 2634818 | 791939606 | 300.5671 |
| 30 | Penghu islands - Chixi | Shikina5-3-2_S108 | 1890352 | 568755174 | 300.8726 |  | 1890352 | 568264132 | 300.6129 |
| 30 | Penghu islands - Chixi | Shikina5-3-3_S109 | 2208654 | 664550788 | 300.885 |  | 2208654 | 664056938 | 300.6614 |
| 31 | Penghu islands - Neian | Shikina5-4-1_S110 | 1934233 | 582101873 | 300.9471 |  | 1934233 | 581622808 | 300.6995 |
| 31 | Penghu islands - Neian | Shikina5-4-2_S111 | 1548199 | 465852438 | 300.8996 |  | 1548199 | 465517819 | 300.6835 |
| 31 | Penghu islands - Neian | Shikina5-4-3_S112 | 1741675 | 524115495 | 300.9261 |  | 1741675 | 523732489 | 300.7062 |
| 32 | Penghu islands - Hangwan-1 | Shikina5-2-1_S104 | 2761412 | 830010104 | 300.5745 |  | 2761412 | 827294503 | 299.5911 |
| 32 | Penghu islands - Hangwan-1 | Shikina5-2-2_S105 | 2841596 | 854678763 | 300.7742 |  | 2841596 | 852876674 | 300.14 |
| 32 | Penghu islands - Hangwan-1 | Shikina5-2-3_S106 | 2665399 | 800998819 | 300.5174 |  | 2665399 | 798515805 | 299.5858 |
| 33 | Penghu islands - Hangwan-2 | Shikina5-6-1_S116 | 2339857 | 702993874 | 300.4431 |  | 2339857 | 701177574 | 299.6668 |
| 33 | Penghu islands - Hangwan-2 | Shikina5-6-2_S117 | 2812788 | 845449022 | 300.5733 |  | 2812788 | 843655142 | 299.9356 |
| 33 | Penghu islands - Hangwan-2 | Shikina5-6-3_S118 | 2572488 | 773102726 | 300.5272 |  | 2572488 | 771652392 | 299.9635 |
| 34 | Penghu islands - Yueli Bay | Shikina5-7-1_S119 | 2476224 | 743552819 | 300.2769 |  | 2476224 | 741683162 | 299.5218 |
| 34 | Penghu islands - Yueli Bay | Shikina5-7-2_S120 | 2634264 | 790796264 | 300.1963 |  | 2634264 | 788601358 | 299.3631 |
| 34 | Penghu islands - Yueli Bay | Shikina5-7-3_S121 | 2745127 | 824739034 | 300.4375 |  | 2745127 | 822551055 | 299.6404 |
| 35 | Penghu islands - Woniu | Shikina5-8-1_S122 | 2294776 | 689122329 | 300.3005 |  | 2294776 | 687266374 | 299.4917 |
| 35 | Penghu islands - Woniu | Shikina5-8-2_S123 | 2649766 | 795942904 | 300.3823 |  | 2649766 | 793844289 | 299.5903 |
| 35 | Penghu islands - Woniu | Shikina5-8-3_S124 | 2204379 | 661689535 | 300.1705 |  | 2204379 | 659802529 | 299.3145 |

| **Supplementary Table S2. ZOTU counts of scleractinian corals at each sampling site** | | | | | |  |  |  |  |  |  |  |  |  |
| --- | --- | --- | --- | --- | --- | --- | --- | --- | --- | --- | --- | --- | --- | --- |
| Site ID | Site name | Genera | | | | | | | | | | | | |
| *Acropora* | *Montipora*/ *Anacropora* | *Pavona* | *Gardineroseris*/ *Leptoseris/Pavona* | *Galaxea* | *Porites* | *Cyphastrea* | *Favites* | *Goniastrea*/ *Merulina* | *Leptoria*/ *Platygyra* | *Pocillopora* | *Stylophora* | others |
| 1 | Coral Farm | **301,187** | **16,043** | **14,966** | **50,109** | **31,115** | **9,978** | **14,623** | **28,351** | **-** | **-** | **7,853** | **169,986** | 79,034 |
| 2 | Guihou | **162,180** | **12,277** | **25,112** | **101,542** | **32** | **162,535** | **93,841** | **78,440** | **14** | **7,682** | **33,561** | **22,471** | 174,845 |
| 3 | Wanghaixiang | **22,456** | **14,296** | **9,640** | **72,552** | **727** | **10,169** | **57,386** | **75,077** | **11** | **7,100** | **1,650** | **60,711** | 94,285 |
| 4 | Taipower SH | **48,926** | **8,672** | **33,490** | **22,451** | **-** | **58,823** | **105,623** | **12,377** | **8** | **5,140** | **307,497** | **-** | 173,334 |
| 5 | CPC SH-1 | **12,958** | **6,337** | **371** | **967** | **-** | **7,960** | **75,469** | **6,770** | **4,745** | **868** | **-** | **-** | 27,988 |
| 6 | CPC SH-2 | **13,257** | **13,048** | **2,012** | **4,369** | **-** | **4,694** | **105,257** | **4,901** | **3** | **378** | **-** | **2** | 16,038 |
| 7 | CPC SH-3 | **196,064** | **93,200** | **7,090** | **27,146** | **445** | **24,937** | **58,294** | **2,515** | **4** | **2,038** | **282** | **1,254** | 67,949 |
| 8 | Nanya | **14,100** | **2,296** | **115** | **17,035** | **-** | **9,523** | **24,642** | **80,849** | **2** | **117,690** | **54,904** | **15,137** | 108,891 |
| 9 | Bitou | **2,949** | **377** | **99** | **15,202** | **34** | **162,234** | **101,289** | **98,499** | **9** | **45,922** | **50,661** | **8,119** | 187,425 |
| 10 | Maoao Bay | **227,400** | **28,813** | **3,711** | **16,717** | **-** | **11,664** | **23,756** | **4,310** | **3** | **230** | **615** | **18,239** | 26,844 |
| 11 | Waiao Beach | **1,883** | **1,289** | **-** | **-** | **-** | **136,073** | **-** | **-** | **-** | **-** | **-** | **-** | 0 |
| 12 | Tofu Cape | **68,069** | **31,081** | **25,165** | **3,210** | **2,451** | **125,219** | **5,645** | **24,434** | **15,336** | **10,948** | **9,800** | **249** | 42,781 |
| 13 | Nanao | **-** | **-** | **-** | **-** | **-** | **-** | **-** | **-** | **-** | **-** | **-** | **-** | 0 |
| 14 | Shitiping | **140,036** | **73,623** | **31,920** | **6,844** | **453** | **79,021** | **8,774** | **28,091** | **81,998** | **155,402** | **211,413** | **457** | 30,817 |
| 15 | Jihui | **57,201** | **68,388** | **80,383** | **1,842** | **5,774** | **150,618** | **45,536** | **72,501** | **29,866** | **96,701** | **91,931** | **7,150** | 95,570 |
| 16 | Shanyuan | **70,731** | **-** | **-** | **-** | **-** | **45,174** | **16,199** | **9,404** | **-** | **2,505** | **44,032** | **-** | 10,498 |
| 17 | Xuhai | **-** | **-** | **-** | **-** | **-** | **-** | **-** | **-** | **-** | **-** | **-** | **-** | 0 |
| 18 | South Bay | **51,928** | **141,292** | **4,157** | **448** | **8,906** | **70,055** | **13,207** | **32,758** | **15,263** | **6,179** | **8,246** | **-** | 74,199 |
| 19 | Houbihu | **2,882** | **212,956** | **34,238** | **1,146** | **-** | **146,384** | **11,543** | **41,419** | **14,169** | **30,909** | **53,399** | **-** | 47,203 |
| 20 | Water Outlet | **17,622** | **126,885** | **158,229** | **6,428** | **54,281** | **56,873** | **5,965** | **55,593** | **13,933** | **90,489** | **21,307** | **-** | 96,352 |
| 21 | Wanlitong | **60** | **588,397** | **1,341** | **339** | **466** | **84,379** | **6,843** | **9,191** | **22** | **153,503** | **2,087** | **-** | 40,918 |
| 22 | Xiziwan | **-** | **3,373** | **1,280** | **-** | **-** | **10,541** | **-** | **-** | **-** | **-** | **25** | **-** | 0 |
| 23 | Xiaoliuqiu Island - Beauty Beach | **30,763** | **34,259** | **1,980** | **11,204** | **159** | **56,049** | **49,869** | **40,836** | **41,808** | **75,038** | **47,737** | **-** | 52,979 |
| 24 | Xiaoliuqiu Island - Yuchengwei | **53,428** | **45,104** | **13,593** | **7,322** | **-** | **89,719** | **40,613** | **29,255** | **17,246** | **40,185** | **53,491** | **-** | 44,902 |
| 25 | Xiaoliuqiu Island- Houshi | **17,773** | **261,052** | **2,789** | **2,139** | **-** | **93,546** | **109,691** | **52,032** | **19,833** | **22,972** | **3,995** | **-** | 186,962 |
| 26 | Taoyuan Algal Reef G1 | **-** | **-** | **-** | **-** | **-** | **-** | **-** | **-** | **-** | **-** | **-** | **-** | 26,562 |
| 27 | Taoyuan Algal Reef G2-1 | **-** | **-** | **-** | **-** | **-** | **-** | **-** | **-** | **-** | **-** | **-** | **-** | 0 |
| 28 | Taoyuan Algal Reef G2-2 | **7** | **-** | **-** | **-** | **-** | **2** | **-** | **-** | **-** | **-** | **-** | **-** | 1,392,595 |
| 29 | Penghu islands - Qitou | **2,218** | **11** | **-** | **-** | **134** | **3,928** | **340** | **-** | **-** | **-** | **94** | **-** | 3,826 |
| 30 | Penghu islands - Chixi | **54,221** | **23,543** | **732** | **1,722** | **8,831** | **21,662** | **55,357** | **37,346** | **-** | **5,649** | **15,278** | **-** | 170,962 |
| 31 | Penghu islands - Neian | **7,431** | **2,950** | **-** | **-** | **1,920** | **12,171** | **4,724** | **4,662** | **-** | **4,118** | **3,560** | **-** | 39,398 |
| 32 | Penghu islands - Hangwan-1 | **544,708** | **26,728** | **2,942** | **2,820** | **1,699** | **393,746** | **29,281** | **23,914** | **-** | **30,914** | **24,493** | **13,772** | 268,447 |
| 33 | Penghu islands - Hangwan-2 | **695,174** | **31,497** | **427** | **69** | **7,094** | **176,798** | **70,476** | **18,084** | **1** | **5,358** | **56,535** | **7,471** | 320,429 |
| 34 | Penghu islands - Yueli Bay | **618,097** | **459,730** | **22,658** | **233** | **-** | **57,724** | **1,081** | **1,013** | **-** | **2,354** | **778** | **1,415** | 103,232 |
| 35 | Penghu islands - Woniu | **848,573** | **206,764** | **61** | **40** | **-** | **37,961** | **-** | **7,745** | **-** | **-** | **1,917** | **687** | 55,839 |

**Supplementary Table S2. ZOTU counts of scleractinian corals at each sampling site.**

**Supplementary Table S3. Relative abundance (%) of scleractinian coral ZOTUs at each sampling site.**
